# Supplementary material for: Sensitivity of Zea mays and Soil Microorganisms to the Toxic Effect of Chromium (VI)
Source: MDPI journal article supplement (doi:10.3390/ijms24010178), 2022-12-22
Supplement: s1 [file s1]

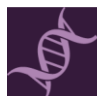

## Sensitivity of *Zea mays* and soil microorganisms to the toxic effect of chromium (VI)

Jadwiga Wyszowska \*, Agata Borowik, Magdalena Zaborowska and Jan Kucharski

Department of Soil Science and Microbiology, Faculty of Agriculture and Forestry, University of Warmia and Mazury in Olsztyn, 10-727 Olsztyn, Poland

\* Correspondence: [jadwiga.wyszowska@uwm.edu.pl](mailto:jadwiga.wyszowska@uwm.edu.pl)

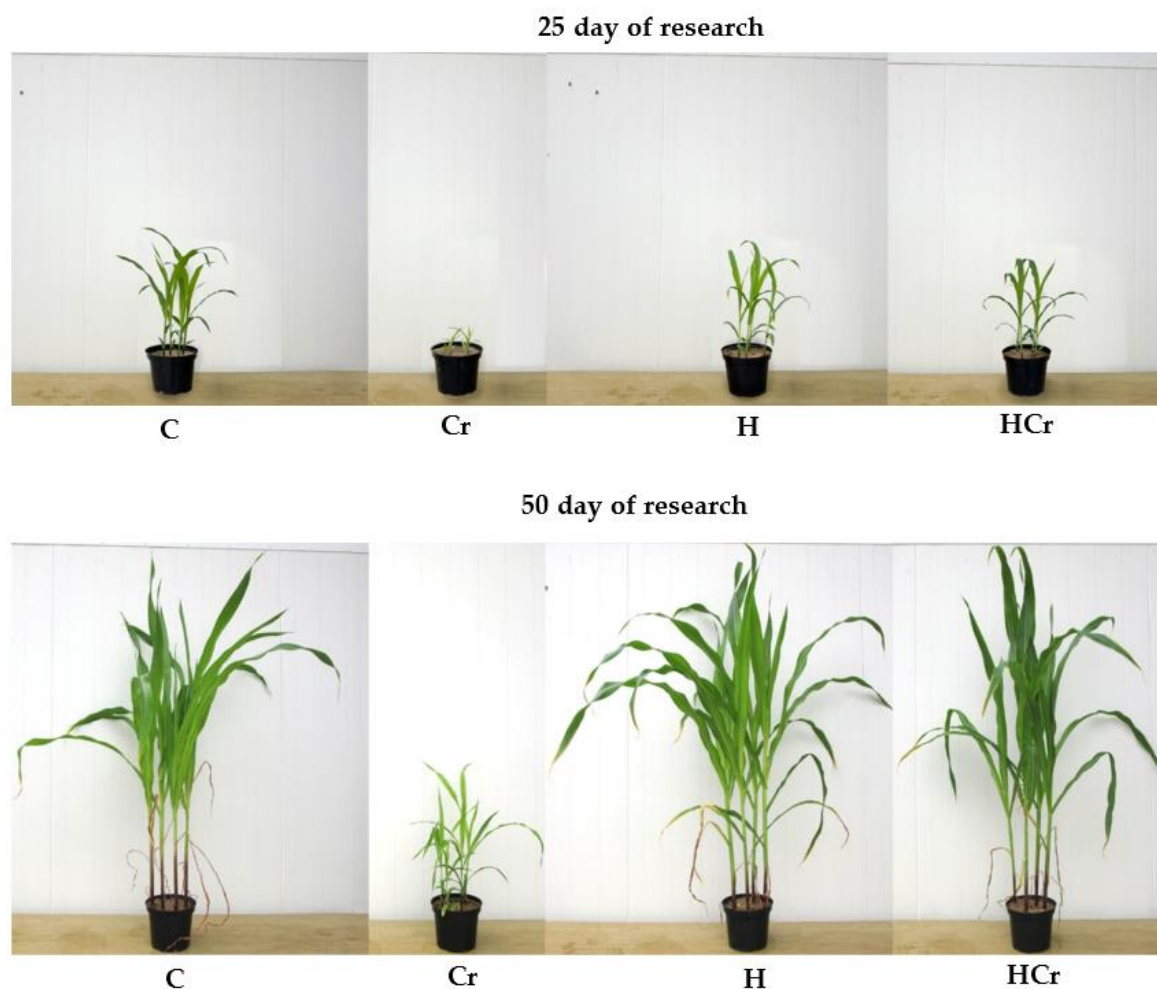

Figure S1. *Zea mays* in the 25<sup>th</sup> and 50<sup>th</sup> day of research

**Table S1.** The number of microorganisms, 10<sup>n</sup> cfu kg<sup>-1</sup> d.m. of soil

| Dose of Cr(VI),<br>mg kg <sup>-1</sup> d.m.<br>of soil | Soil use              |                       |                           |                       |
|--------------------------------------------------------|-----------------------|-----------------------|---------------------------|-----------------------|
|                                                        | Unsown                |                       | Sown with <i>Zea mays</i> |                       |
|                                                        | Analysis day          |                       |                           |                       |
|                                                        | 25                    | 50                    | 25                        | 50                    |
| Organotrophic bacteria, 10 <sup>9</sup>                |                       |                       |                           |                       |
| Control                                                |                       |                       |                           |                       |
| 0                                                      | 18.340 <sup>de</sup>  | 14.938 <sup>ef</sup>  | 35.496 <sup>b</sup>       | 34.559 <sup>b</sup>   |
| 60                                                     | 7.148 <sup>gh</sup>   | 2.909 <sup>h</sup>    | 10.452 <sup>fg</sup>      | 19.966 <sup>d</sup>   |
| HumiAgra (H)                                           |                       |                       |                           |                       |
| 0                                                      | 32.932 <sup>b</sup>   | 21.199 <sup>d</sup>   | 35.742 <sup>b</sup>       | 44.173 <sup>a</sup>   |
| 60                                                     | 13.656 <sup>f</sup>   | 11.142 <sup>fg</sup>  | 14.445 <sup>ef</sup>      | 26.277 <sup>c</sup>   |
| Actinomyces, 10 <sup>9</sup>                           |                       |                       |                           |                       |
| Control                                                |                       |                       |                           |                       |
| 0                                                      | 11.142 <sup>hi</sup>  | 19.326 <sup>ef</sup>  | 32.390 <sup>b</sup>       | 27.559 <sup>c</sup>   |
| 60                                                     | 3.648 <sup>j</sup>    | 12.325 <sup>gh</sup>  | 17.255 <sup>f</sup>       | 13.952 <sup>g</sup>   |
| HumiAgra                                               |                       |                       |                           |                       |
| 0                                                      | 22.382 <sup>d</sup>   | 32.193 <sup>b</sup>   | 36.482 <sup>a</sup>       | 32.932 <sup>b</sup>   |
| 60                                                     | 9.022 <sup>i</sup>    | 13.508 <sup>gh</sup>  | 21.100 <sup>de</sup>      | 13.656 <sup>gh</sup>  |
| Fungi, 10 <sup>7</sup>                                 |                       |                       |                           |                       |
| Control                                                |                       |                       |                           |                       |
| 0                                                      | 15.776 <sup>g</sup>   | 19.326 <sup>c-f</sup> | 17.452 <sup>e-g</sup>     | 21.692 <sup>bc</sup>  |
| 60                                                     | 10.994 <sup>i</sup>   | 15.529 <sup>gh</sup>  | 11.684 <sup>i</sup>       | 16.565 <sup>fg</sup>  |
| HumiAgra                                               |                       |                       |                           |                       |
| 0                                                      | 19.966 <sup>c-e</sup> | 20.854 <sup>b-d</sup> | 25.439 <sup>a</sup>       | 23.565 <sup>ab</sup>  |
| 60                                                     | 12.473 <sup>hi</sup>  | 15.529 <sup>gh</sup>  | 18.290 <sup>d-g</sup>     | 19.473 <sup>c-f</sup> |

Homogeneous groups within each microbial group are marked with identical letters (a-j).

**Table S2.** Colony Development Index (CD) of microorganisms

| Dose of Cr(VI),<br>mg kg <sup>-1</sup> d.m. of<br>soil | Soil use              |                       |                           |                       |
|--------------------------------------------------------|-----------------------|-----------------------|---------------------------|-----------------------|
|                                                        | Unsown                |                       | Sown with <i>Zea mays</i> |                       |
|                                                        | Analysis day          |                       |                           |                       |
|                                                        | 25                    | 50                    | 25                        | 50                    |
| Organotrophic bacteria, 10 <sup>9</sup>                |                       |                       |                           |                       |
|                                                        | Control               |                       |                           |                       |
| 0                                                      | 29.522 <sup>a-c</sup> | 27.727 <sup>a-d</sup> | 29.291 <sup>a-c</sup>     | 28.448 <sup>a-d</sup> |
| 60                                                     | 31.096 <sup>ab</sup>  | 26.742 <sup>b-d</sup> | 27.016 <sup>b-d</sup>     | 28.281 <sup>a-d</sup> |
| HumiAgra                                               |                       |                       |                           |                       |
| 0                                                      | 31.434 <sup>a</sup>   | 31.788 <sup>a</sup>   | 31.488 <sup>a</sup>       | 29.638 <sup>a-c</sup> |
| 60                                                     | 24.767 <sup>d</sup>   | 26.387 <sup>cd</sup>  | 25.808 <sup>cd</sup>      | 28.321 <sup>a-d</sup> |
| Actinomyces, 10 <sup>9</sup>                           |                       |                       |                           |                       |
|                                                        | Control               |                       |                           |                       |
| 0                                                      | 26.555 <sup>bc</sup>  | 20.448 <sup>f-h</sup> | 20.731 <sup>f-h</sup>     | 30.156 <sup>a</sup>   |
| 60                                                     | 24.535 <sup>c-e</sup> | 17.899 <sup>hi</sup>  | 19.109 <sup>g-i</sup>     | 24.756 <sup>b-d</sup> |
| HumiAgra                                               |                       |                       |                           |                       |
| 0                                                      | 27.618 <sup>ab</sup>  | 20.998 <sup>fg</sup>  | 22.697 <sup>d-f</sup>     | 21.232 <sup>fg</sup>  |
| 60                                                     | 17.320 <sup>i</sup>   | 21.534 <sup>e-g</sup> | 19.118 <sup>g-i</sup>     | 19.980 <sup>f-i</sup> |
| Fungi, 10 <sup>7</sup>                                 |                       |                       |                           |                       |
|                                                        | Control               |                       |                           |                       |
| 0                                                      | 27.726 <sup>i</sup>   | 30.735 <sup>i</sup>   | 30.991 <sup>hi</sup>      | 33.018 <sup>fg</sup>  |
| 60                                                     | 33.974 <sup>d-f</sup> | 36.871 <sup>b</sup>   | 34.906 <sup>c-e</sup>     | 37.056 <sup>b</sup>   |
| HumiAgra                                               |                       |                       |                           |                       |
| 0                                                      | 30.311 <sup>i</sup>   | 35.198 <sup>b-d</sup> | 31.930 <sup>g-i</sup>     | 33.096 <sup>e-g</sup> |
| 60                                                     | 32.811 <sup>f-h</sup> | 39.014 <sup>a</sup>   | 39.007 <sup>a</sup>       | 35.851 <sup>bc</sup>  |

Homogeneous groups within each microbial group are marked with identical letters (a-j).

**Table S3.** Index of the ecophysiological diversity (EP) of microorganisms

| Dose of Cr(VI),<br>mg kg <sup>-1</sup> d.m.<br>of soil | Soil use             |                     |                           |                      |
|--------------------------------------------------------|----------------------|---------------------|---------------------------|----------------------|
|                                                        | Unsown               |                     | Sown with <i>Zea mays</i> |                      |
|                                                        | Analysis day         |                     |                           |                      |
|                                                        | 25                   | 50                  | 25                        | 50                   |
| Organotrophic bacteria, 10 <sup>9</sup>                |                      |                     |                           |                      |
| Control                                                |                      |                     |                           |                      |
| 0                                                      | 0.837 <sup>b-d</sup> | 0.776 <sup>d</sup>  | 0.887 <sup>a-c</sup>      | 0.833 <sup>b-d</sup> |
| 60                                                     | 0.839 <sup>b-d</sup> | 0.892 <sup>ab</sup> | 0.880 <sup>bc</sup>       | 0.827 <sup>cd</sup>  |
| HumiAgra (H)                                           |                      |                     |                           |                      |
| 0                                                      | 0.854 <sup>bc</sup>  | 0.858 <sup>bc</sup> | 0.893 <sup>ab</sup>       | 0.699 <sup>e</sup>   |
| 60                                                     | 0.872 <sup>bc</sup>  | 0.842 <sup>bc</sup> | 0.947 <sup>a</sup>        | 0.876 <sup>bc</sup>  |
| Actinomyces, 10 <sup>9</sup>                           |                      |                     |                           |                      |
| Control                                                |                      |                     |                           |                      |
| 0                                                      | 0.777 <sup>cd</sup>  | 0.865 <sup>ab</sup> | 0.810 <sup>b-d</sup>      | 0.816 <sup>b-d</sup> |
| 60                                                     | 0.677 <sup>e</sup>   | 0.885 <sup>ab</sup> | 0.761 <sup>cd</sup>       | 0.886 <sup>ab</sup>  |
| HumiAgra                                               |                      |                     |                           |                      |
| 0                                                      | 0.753 <sup>de</sup>  | 0.901 <sup>a</sup>  | 0.893 <sup>ab</sup>       | 0.908 <sup>a</sup>   |
| 60                                                     | 0.592 <sup>f</sup>   | 0.873 <sup>ab</sup> | 0.841 <sup>a-c</sup>      | 0.753 <sup>de</sup>  |
| Fungi, 10 <sup>7</sup>                                 |                      |                     |                           |                      |
| Control                                                |                      |                     |                           |                      |
| 0                                                      | 0.736 <sup>ab</sup>  | 0.614 <sup>g</sup>  | 0.708 <sup>bc</sup>       | 0.673 <sup>d-f</sup> |
| 60                                                     | 0.649 <sup>e-g</sup> | 0.597 <sup>gh</sup> | 0.626 <sup>fg</sup>       | 0.546 <sup>hi</sup>  |
| HumiAgra                                               |                      |                     |                           |                      |
| 0                                                      | 0.705 <sup>b-d</sup> | 0.609 <sup>g</sup>  | 0.705 <sup>b-d</sup>      | 0.783 <sup>a</sup>   |
| 60                                                     | 0.601 <sup>gh</sup>  | 0.530 <sup>i</sup>  | 0.509 <sup>i</sup>        | 0.625 <sup>fg</sup>  |

Homogeneous groups within each microbial group are marked with identical letters (a-i).
